# Supplementary material
Source: HighWire-hosted journal article supplement (https://dmd.aspetjournals.org/highwire/filestream/76500/field_highwire_adjunct_files/0/DMD274_Supp_fig1.pdf)
Supplement: DMD274_Supp_fig1.pdf [file DMD274_Supp_fig1.pdf]

Tryptophan-75 is a low energy channel gating residue that facilitates substrate egress/access in cytochrome P450 2D6. McCarty, Ratliff, K. Furge, L. Furge. *Drug Metab Dispos*, DMD-AR-2020-000274.

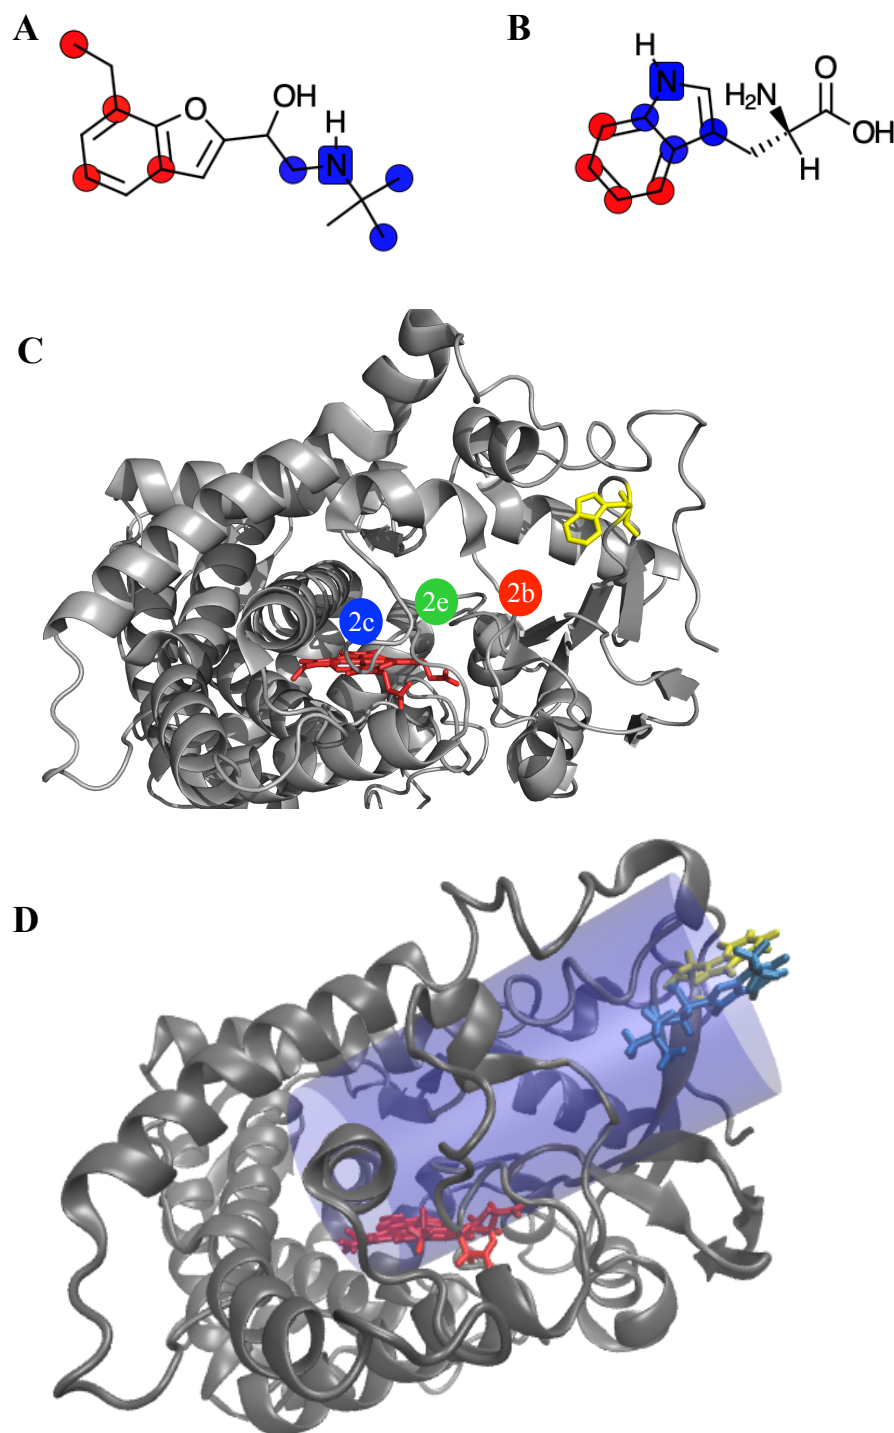

**Supp Figure S1. Graphical representation of collective variables and cylindrical restraints used in simulations.** (A). Bufuralol collective variables. (B.) Trp75 collective variables. (C). Channel 2c, 2e, and 2b of CYP2D6. Trp75 is shown in yellow. Crystal structure 3QM4, Chain A [channel nomenclature of Wade (Cojocaru et al., 2007)]. (D). Position of cylindrical restraint on channel 2b in MD simulations with bufuralol egressing (Trp75 in yellow and bufuralol in turquoise).
